# Supplementary material
Source: publisher site journal article supplement (https://www.dovepress.com/article/421060)
Supplement: Supplementary file 1 [file get_supplementary_file.php]

The Post Pandemic-Health Promotion Behavior (PP-HPB) scale

These questions are related to your health promotion behavior. Please read the questions and check where applicable.

| No. | Item | Never | Seldom | Sometimes | Often | Almost always |
| --- | --- | --- | --- | --- | --- | --- |
| 1 | I live in a positive frame of mind every day. | ① | ② | ③ | ④ | ⑤ |
| 2 | I process my emotions by expressing them honestly to others. | ① | ② | ③ | ④ | ⑤ |
| 3 | I set and follow through with actionable goals. | ① | ② | ③ | ④ | ⑤ |
| 4 | I have and practice my own positive ways of dealing with stress. | ① | ② | ③ | ④ | ⑤ |
| 5 | I maintain meaningful and fulfilling interpersonal relationships. | ① | ② | ③ | ④ | ⑤ |
| 6 | I express concern and love for those around me. | ① | ② | ③ | ④ | ⑤ |
| 7 | I don’t hesitate to ask a friend for help or support. | ① | ② | ③ | ④ | ⑤ |
| 8 | I practice my own methods to help me sleep. | ① | ② | ③ | ④ | ⑤ |
| 9 | I wash my hands thoroughly after returning from going out, before eating food, and after using the restroom. | ① | ② | ③ | ④ | ⑤ |
| 10 | I follow institutional (government, workplace, school) guidelines to prevent infectious diseases. | ① | ② | ③ | ④ | ⑤ |
| 11 | I keep my space well ventilated (open windows, use an air purifier, etc.). | ① | ② | ③ | ④ | ⑤ |
| 12 | I keep my primary use areas clean (sweeping, wiping, disposing of food, etc.). | ① | ② | ③ | ④ | ⑤ |
| 13 | I brush my teeth after meals and snacks and before bedtime. | ① | ② | ③ | ④ | ⑤ |
| 14 | I don’t eat sweet foods (sugary foods, desserts, sugary drinks, etc.). | ① | ② | ③ | ④ | ⑤ |
| 15 | I don’t eat foods that use a lot of oil (instant, fried, etc.). | ① | ② | ③ | ④ | ⑤ |
| 16 | I don’t eat foods that are too spicy (“hot,” “salty,” etc.). | ① | ② | ③ | ④ | ⑤ |
| 17 | I don’t eat late-night snacks after dinner. | ① | ② | ③ | ④ | ⑤ |
| 18 | I have balanced meals that include the three main nutrients (carbohydrates, proteins, and fats). | ① | ② | ③ | ④ | ⑤ |
| 19 | I check with a health professional to make sure health information I get from the internet or others is accurate. | ① | ② | ③ | ④ | ⑤ |
| 20 | I frequently observe and check for changes in my body. | ① | ② | ③ | ④ | ⑤ |
| 21 | I take measures to protect my eyesight when using mobile devices (use a screen protector, adjust brightness, maintain sufficient distance, etc.). | ① | ② | ③ | ④ | ⑤ |
| 22 | I take measures to protect my hearing when using mobile devices (limit earphones to 60 minutes of use per day, keep volume at 60% of maximum). | ① | ② | ③ | ④ | ⑤ |
| 23 | I take breaks in ways other than using mobile devices. | ① | ② | ③ | ④ | ⑤ |
| 24 | I stretch my wrists, neck, shoulders, and back after using a mobile device (phone, tablet, or laptop). | ① | ② | ③ | ④ | ⑤ |
| 25 | I do strength training at least 2 days a week. | ① | ② | ③ | ④ | ⑤ |
| 26 | I engage in aerobic physical activity (including walking) for at least two and a half hours per week. | ① | ② | ③ | ④ | ⑤ |
| 27 | I spend 2 hours or less sitting except for study or work. | ① | ② | ③ | ④ | ⑤ |
